# Supplementary material
Source: PubMed Central journal article supplement (PMC3436957)
Supplement: NIHMS378747-supplement-Supp_Fig_S1-S3.pdf [file NIHMS378747-supplement-Supp_Fig_S1-S3.pdf]

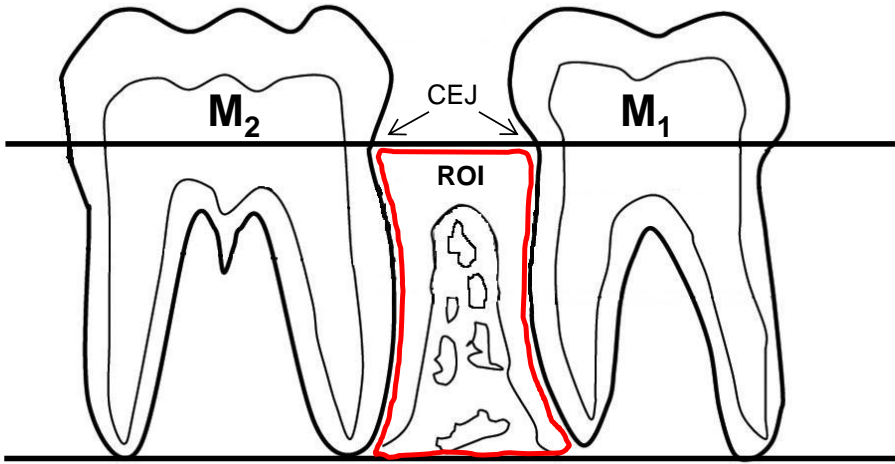

# body weight

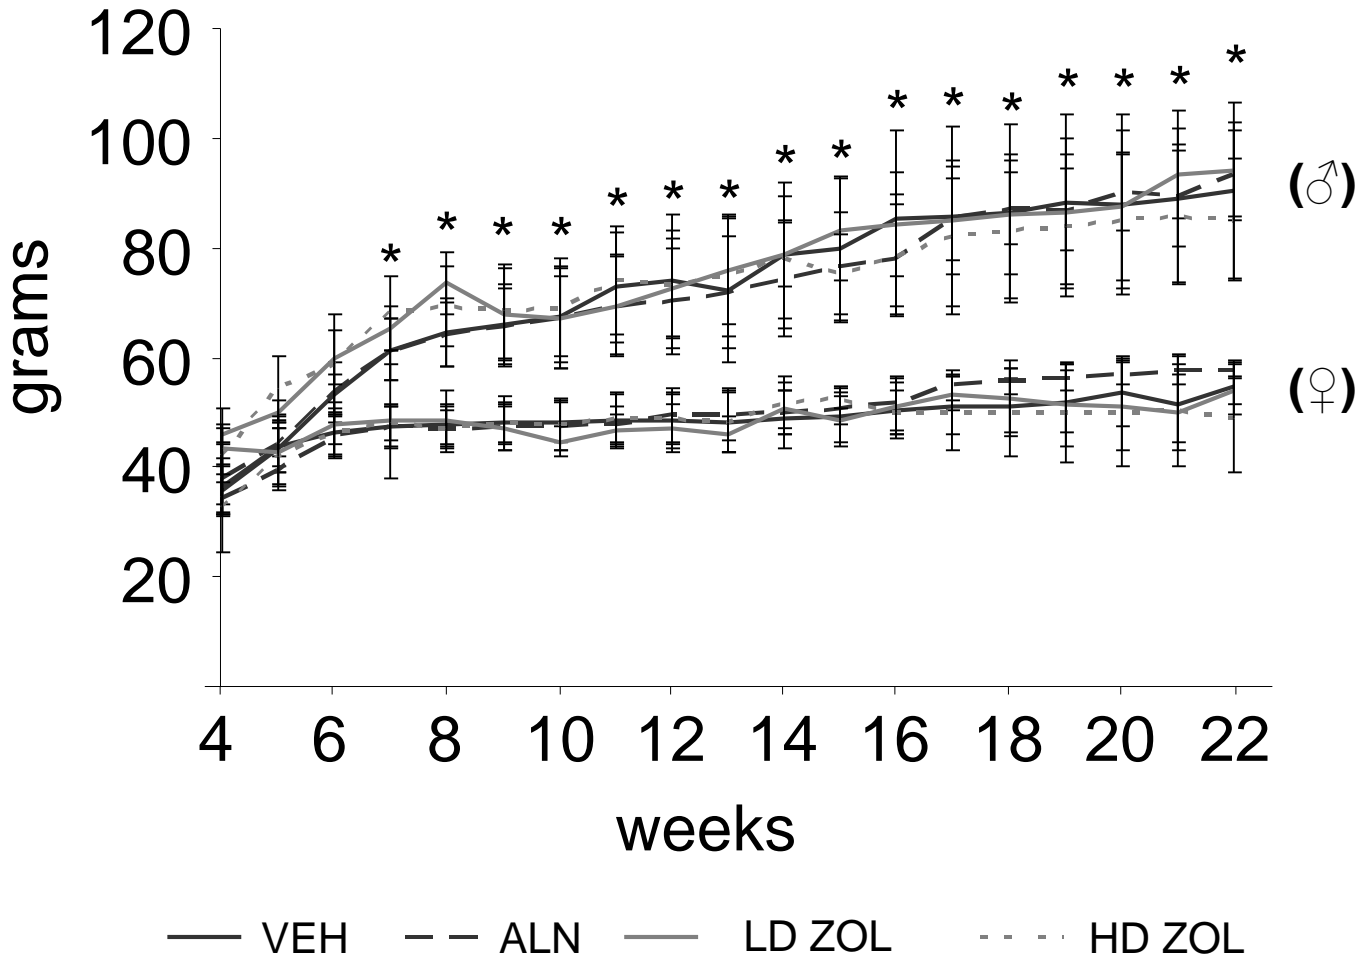

## total bone mineral content (BMC)

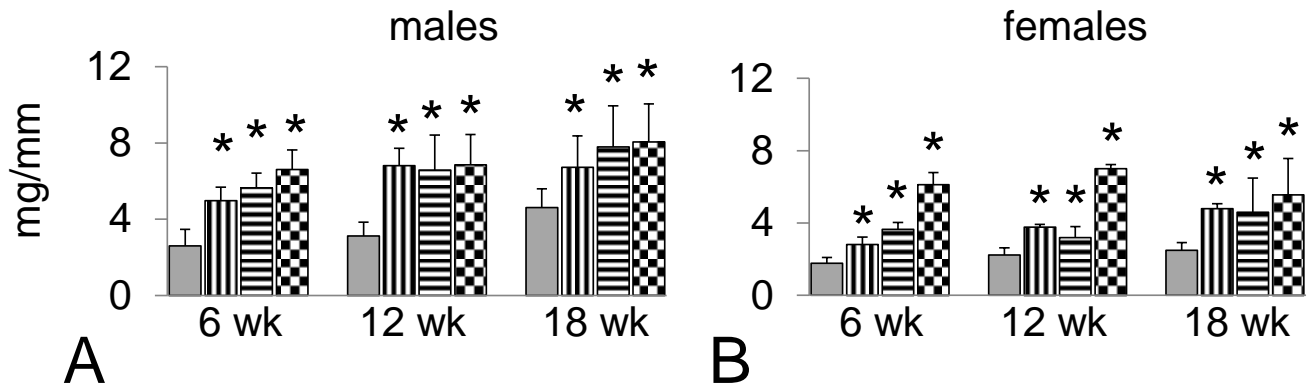

## total bone mineral density (BMD)

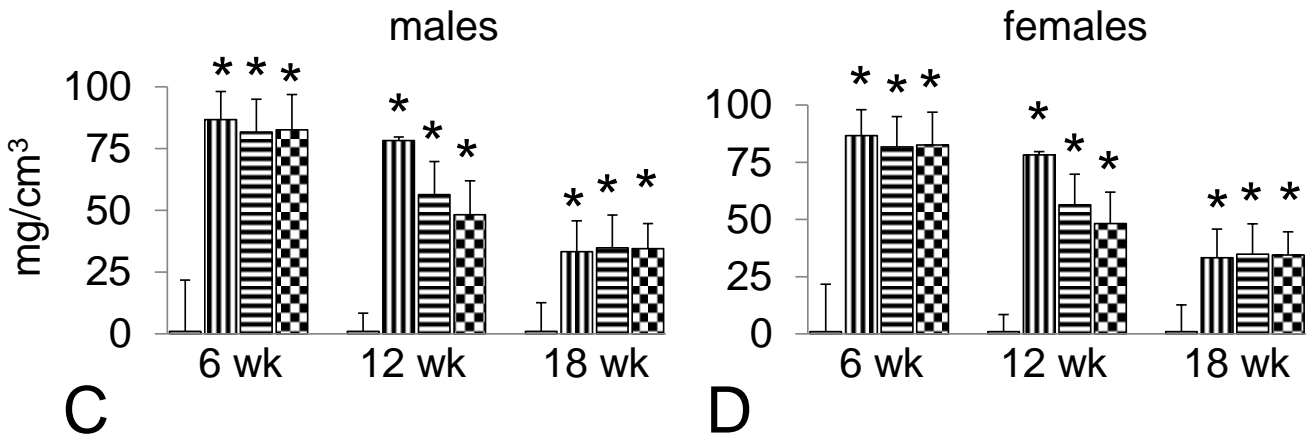

## bone mineral area (BMA)

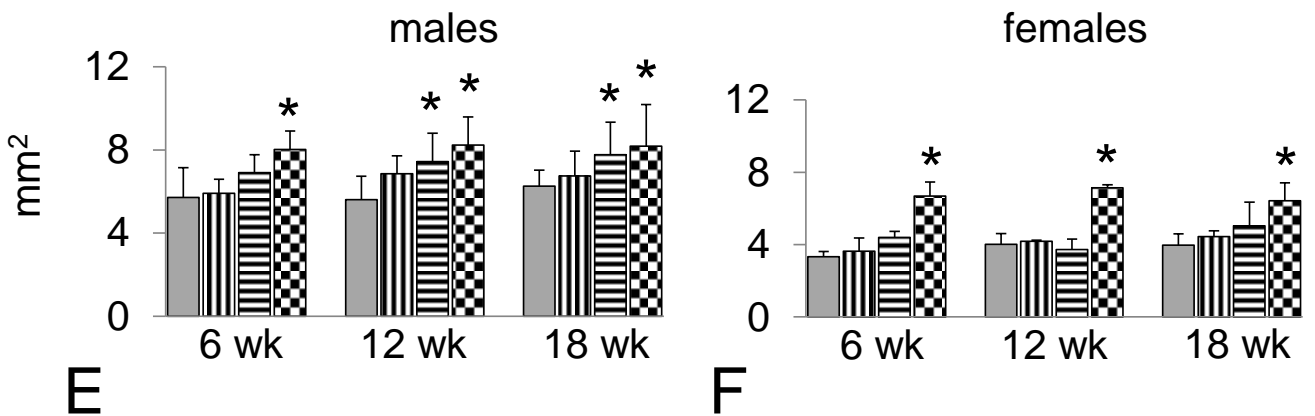

VEH
  ALN
  LD ZOL
  HD ZOL
